# Supplementary material
Source: PubMed Central journal article supplement (PMC2049021)
Supplement: bj4070219add.pdf [file bj4070219add.pdf]

**Supplemental Table S1. Sequences of primers used for quantitative real-time as well as sizes and melting temperatures of amplicons.** Primer sets were designed using Primer Express<sup>TM</sup> from Applied Biosystems. All used primers were obtained from DNA technology.

| Gene   | Upstream primer<br>(5'→3')        | Downstream primer<br>(5'→3')       | T <sub>M</sub><br>(°C) | Product size<br>(bp) |
|--------|-----------------------------------|------------------------------------|------------------------|----------------------|
| ACT1   | GAA ACT TTC AAC GTT CCA GCC TT    | AGG ACA AAA CGG CTT GGA TG         | 79                     | 52                   |
| CHO1   | CGA AAA TGA CGG GTA TGC CT        | CTT CTG CTT AAT GTG CCA CCA A      | 79                     | 51                   |
| CHO2   | CTT TCA AAC CAC CTG TAA CCC AC    | TTG GAT CGA AAA GCG AAC G          | 79                     | 51                   |
| CKA2   | CTC CAT GGG CAT AAT GCA CA        | TCA ATC ATG ACA TTC TGA GGC TTT    | 78                     | 51                   |
| CTT1   | CGT TGG TGG TGA AAG TGG TAC A     | ACA CCT CTT GGG TCT CTT GCA        | 81                     | 51                   |
| DDR2   | CTG TCT TCG GCC TCG CTA CT        | TGG TGT TGG ATG CGT TTT GA         | 80                     | 51                   |
| ELO1   | TCG CTT CCA GCC AAA GGA T         | CTC AAA GGC TGC TTC CCA AC         | 80                     | 51                   |
| ERG11  | CGC TAA GTT GGC AGA TGT TTC AG    | GTA GTC AAA TGA GCG TAA GCA GCT    | 79                     | 51                   |
| FAS1   | CTT GCC AGG TAC TAT CAC GCA C     | GCA CGG ACG GAA GCA GAA            | 81                     | 51                   |
| FAS2   | ACC AGT TGA TGA CAA GGA CGT TAA G | TCT AGG ATT GAT GTT TCA TAC TTG GC | 76                     | 51                   |
| GPD1   | TCA AGG TTG CTA GGC TAA TGG C     | CAC ATT CCC AGG CGT CCT TA         | 80                     | 51                   |
| HSP12  | ACA AGG TCG CTG GTA AGG TTC A     | CTT GGA AGA CAC CCT TGT TGT CT     | 80                     | 51                   |
| HSP26  | GGA CCA TGA CAA CAA CTA CGA GTT   | GCT TTT GAC ACC AGG AAC CAC        | 79                     | 52                   |
| HSP104 | AGG ATT CTG GAT AGC GCC TTA GT    | GTA ACG CTT GGC TAA TTG AGC A      | 80                     | 51                   |
| INO1   | GCT GAG CAT GAG GGT ACA TTC A     | TTG TCC CGA CTT GAG ATC GTC        | 81                     | 51                   |
| INO2   | GTT ACC CAC AAA CAC AGC AGA TG    | CCT TCC CTC GTG GTG AAC TC         | 81                     | 51                   |
| INO4   | AGC GAT CCC GTA CAA GAA CAA       | CTC CTT CGG TAC TAA ATC CCG AAT    | 78                     | 54                   |
| OLE1   | TAG GTA AGG ACG CTA CCA AGG C     | TTG AGT GAC GGT AGA CAC CAC C      | 80                     | 51                   |
| OPI1   | CAA GCT GAA CAT GTC CAT CGA       | TGC AAG CAC GTT ACA AGC CT         | 79                     | 51                   |
| OPI3   | AAC AAC CCC ATG TAC CAG GGT       | AAG GGC TAT GCC CAA GAA GG         | 80                     | 51                   |
| PEP4   | GCT GAG GCT ACC AGC GAG C         | CAT CGA ACT TGC CAA ATG CA         | 82                     | 52                   |
| PIS1   | AGA CGG AAC CAT GGC AAG AA        | ACG GCA CCC AGA CTG GAA            | 80                     | 51                   |
| PSD1   | TTC AGC AAC GAC GCA GTT CT        | CAG CAG CTT TGG CAC GAT C          | 81                     | 51                   |
| PSD2   | AGG AAG GAC ACC ACG ACG AG        | GGT ACC GCT GAG CTT CAA TTG        | 79                     | 52                   |
| TDH1   | GTT TCC CAT GAC GAC AAG GA        | GGT AGC GAT CTT GAC ACC ATC AA     | 79                     | 51                   |
| HAC1   | CCC ACT CTG CGA CGA TAT AGC       | ACC TGA CTG CGC TTC TGG AT         | 79                     | 91                   |

**Supplemental Table S2. A list of some of the most upregulated and downregulated genes obtained in response to Acb1p depletion.** Fold- upregulation and downregulation of genes in response to Acb1p depletion are represented by positive- and negative values, respectively. Each value is an average of results obtained from two microarrays (dye reversal). Wild type and Acb1p depleted cells were grown in YPD media.

| GeneID                                        | Gene  | Function                                                    | Process                                                                                              | Fold change <sup>a</sup> ± S.D. |
|-----------------------------------------------|-------|-------------------------------------------------------------|------------------------------------------------------------------------------------------------------|---------------------------------|
| <b>Stress response</b>                        |       |                                                             |                                                                                                      |                                 |
| ydr001c                                       | NTH1  | neutral trehalase (alpha,alpha-trehalase)                   | response to stress; trehalose catabolism                                                             | 3.9 ± 0.83                      |
| yll039c                                       | UBI4  | ubiquitin                                                   | response to stress; protein deubiquitination; protein monoubiquitination; protein polyubiquitination | 3.6 ± 0.96                      |
| ymr251w-a                                     | HOR7  | hyperosmolarity-responsive protein                          | response to stress                                                                                   | 5.6 ± 1.3                       |
| yol052c-a                                     | DDR2  | heat shock protein DDRA2                                    | response to stress                                                                                   | 6.9 ± 0.71                      |
| <b>Lipid metabolism</b>                       |       |                                                             |                                                                                                      |                                 |
| ygl001c                                       | ERG26 | C-3 sterol dehydrogenase (C-4 decarboxylase)                | ergosterol biosynthesis                                                                              | -1.6 ± 0.08                     |
| ygl055w                                       | OLE1  | stearoyl-CoA desaturase                                     | fatty acid desaturation; mitochondrion inheritance                                                   | 1.9 ± 0.75                      |
| ygr037c                                       | ACB1  | acyl-coenzyme-A-binding protein(diazepam binding inhibitor) | fatty acid metabolism; long- chain fatty acid transport                                              | -11.5 ± 2.5                     |
| ygr177c                                       | ATF2  | alcohol O-acetyltransferase                                 | steroid metabolism                                                                                   | -1.7 ± 0.49                     |
| yk1182w                                       | FAS1  | fatty-acyl-CoA synthase, beta chain                         | fatty acid biosynthesis                                                                              | 1.6 ± 0.25                      |
| ylr056w                                       | ERG3  | C-5 sterol desaturase                                       | ergosterol biosynthesis                                                                              | -1.9 ± 0.15                     |
| ynr016c                                       | ACC1  | acetyl-CoA carboxylase                                      | fatty acid biosynthesis                                                                              | 1.6 ± 0.33                      |
| yp1028w                                       | ERG10 | acetyl-CoA C-acetyltransferase, cytosolic                   | ergosterol biosynthesis                                                                              | 1.6 ± 0.14                      |
| yp1117c                                       | IDI1  | isopentenyl-diphosphate delta-isomerase                     | ergosterol biosynthesis                                                                              | 1.8 ± 0.72                      |
| yp1170w                                       | DAP1  | similarity to C.elegans LIM homeobox protein                | sterol metabolism                                                                                    | 2.5 ± 0.37                      |
| yp1231w                                       | FAS2  | fatty-acyl-CoA synthase, alpha chain                        | fatty acid biosynthesis                                                                              | 1.8 ± 0.17                      |
| <b>Protein sorting</b>                        |       |                                                             |                                                                                                      |                                 |
| ynl044w                                       | YIP3  | protein of unknown function                                 | ER to Golgi transport                                                                                | 1.7 ± 0.35                      |
| ynl263c                                       | YIF1  | Slh1p Interacting Factor                                    | ER to Golgi transport                                                                                | 1.7 ± 0.12                      |
| yor216c                                       | RUD3  | suppressor of USO1-1 transport defect                       | ER to Golgi transport                                                                                | -2.1 ± 0.18                     |
| <b>Proteolysis</b>                            |       |                                                             |                                                                                                      |                                 |
| yp1154c                                       | PEP4  | aspartyl protease                                           | vacuolar protein catabolism; cellular response to starvation; sporulation; microautophagy            | 1.8 ± 0.14                      |
| <b>C-compound and Carbohydrate metabolism</b> |       |                                                             |                                                                                                      |                                 |
| ydl022w                                       | GPD1  | glycerol-3-phosphate dehydrogenase (NAD+), cytoplasmic      | intracellular accumulation of glycerol                                                               | 6.4 ± 1.8                       |
| yjl052w                                       | TDH1  | glyceraldehyde-3-phosphate dehydrogenase 1                  | glycolysis; gluconeogenesis                                                                          | 4.8 ± 0.16                      |
| <b>Sphingolipid/ceramide metabolism</b>       |       |                                                             |                                                                                                      |                                 |
| yk1004w                                       | AUR1  | aureobasidin-resistance protein                             | sphingolipid metabolism                                                                              | 2.3 ± 0.68                      |
| <b>Transporters/permeases</b>                 |       |                                                             |                                                                                                      |                                 |
| ydr497c                                       | ITR1  | myo-inositol permease, major                                | myo-inositol transport                                                                               | 2.2 ± 0.16                      |
| ygl077c                                       | HNM1  | choline permease                                            | choline transport                                                                                    | 2.4 ± 0.59                      |
| ygl255w                                       | ZRT1  | high-affinity zinc transport protein                        | high-affinity zinc ion transport                                                                     | -2.8 ± 0.64                     |
| ylr130c                                       | ZRT2  | low affinity zinc transporter                               | low-affinity zinc ion transport                                                                      | -1.8 ± 0.59                     |
| ymr243c                                       | ZRC1  | zinc- and cadmium resistance protein                        | zinc ion transport; cobalt ion transport; zinc ion homeostasis; glutathione metabolism               | -1.7 ± 0.10                     |
| ynl055c                                       | POR1  | mitochondrial outer membrane porin                          | aerobic respiration; ion transport; mitochondrion organization and biogenesis                        | 2.2 ± 0.72                      |
| <b>Phospholipid metabolism</b>                |       |                                                             |                                                                                                      |                                 |
| yer026c                                       | CHO1  | CDP-diacylglycerol serine O-phosphatidyl-transferase        | phosphatidylserine biosynthesis                                                                      | 1.8 ± 0.24                      |
| ygr157w                                       | CHO2  | phosphatidylethanolamine N-methyltransferase                | phosphatidylcholine biosynthesis                                                                     | 1.8 ± 0.51                      |
| yjr073c                                       | OPI3  | methylene-fatty-acyl-phospholipid synthase                  | phosphatidylcholine biosynthesis                                                                     | 2.9 ± 0.68                      |
| <b>Protein folding</b>                        |       |                                                             |                                                                                                      |                                 |
| ycl043c                                       | PDI1  | protein disulfide-isomerase precursor                       | protein folding                                                                                      | 2.2 ± 0.17                      |
| yjl034w                                       | KAR2  | nuclear fusion protein                                      | response to unfolded protein                                                                         | 1.9 ± 0.98                      |
| ylr350w                                       | ORM2  | strong similarity to ORM1                                   | response to unfolded protein                                                                         | 2.8 ± 0.43                      |

<sup>a</sup> Positive values correspond to gene expression that is negatively affected by *ACB1* (increased in Acb1p depleted cells). Negative values correspond to gene expression that is positively affected by *ACB1* (decreased in Acb1p depleted cells). S.D. indicates standard deviation of two independent experiments.

**Supplementary data S3. Distribution of PI species in Y700 *pGAL-ACBI* and Y700 cells.**

| Strain                                      | Molecular species <sup>1</sup> |                |                |                |                |                |                 |                |
|---------------------------------------------|--------------------------------|----------------|----------------|----------------|----------------|----------------|-----------------|----------------|
|                                             | 28:0                           | 30:0           | 30:1           | 32:0           | 32:1           | 34:1           | 34:2            | 36:1           |
| <u><i>YPD media</i></u>                     |                                |                |                |                |                |                |                 |                |
| Y700 <sup>2</sup>                           | 0.12<br>± 0.03                 | 0.20<br>± 0.07 | 0.02<br>± 0.01 | 1.28<br>± 0.06 | 0.19<br>± 0.02 | 3.40<br>± 0.49 | 0.67<br>± 0.002 | 1.15<br>± 0.33 |
| Percent <sup>3</sup>                        | 1.6<br>± 0.56                  | 2.8<br>± 1.18  | 0.3<br>± 0.05  | 17.1<br>± 1.02 | 2.6<br>± 0.04  | 45.2<br>± 1.64 | 9.0<br>± 0.94   | 15.1<br>± 2.77 |
| Y700 <i>pGAL-ACBI</i> <sup>2</sup>          | 0.82<br>± 0.25                 | 0.87<br>± 0.13 | 0.43<br>± 0.13 | 1.74<br>± 0.26 | 1.24<br>± 0.04 | 1.89<br>± 0.19 | 1.68<br>± 0.34  | 0.63<br>± 0.01 |
| Percent <sup>3</sup>                        | 8.3<br>± 2.89                  | 8.8<br>± 1.65  | 4.4<br>± 1.51  | 17.6<br>± 1.97 | 12.6<br>± 0.10 | 19.1<br>± 1.18 | 16.9<br>± 2.74  | 6.3<br>± 0.16  |
| .....                                       |                                |                |                |                |                |                |                 |                |
| <u><i>SC media (+ ino.)</i><sup>4</sup></u> |                                |                |                |                |                |                |                 |                |
| Y700 <sup>2</sup>                           | 0.18<br>± 0.16                 | 0.36<br>± 0.33 | 0.04<br>± 0.05 | 1.98<br>± 1.55 | 0.38<br>± 0.33 | 2.99<br>± 2.42 | 0.49<br>± 0.39  | 0.75<br>± 0.58 |
| Percent <sup>3</sup>                        | 2.4<br>± 0.27                  | 4.5<br>± 0.75  | 0.5<br>± 0.25  | 26.9<br>± 1.04 | 4.9<br>± 0.44  | 40.2<br>± 0.07 | 6.6<br>± 0.16   | 10.3<br>± 0.56 |
| Y700 <i>pGAL-ACBI</i> <sup>2</sup>          | 0.45<br>± 0.37                 | 0.44<br>± 0.29 | 0.22<br>± 0.16 | 1.11<br>± 0.97 | 0.92<br>± 0.64 | 1.17<br>± 0.91 | 0.95<br>± 0.69  | 0.27<br>± 0.22 |
| Percent <sup>3</sup>                        | 7.5<br>± 0.61                  | 7.8<br>± 0.94  | 3.8<br>± 0.18  | 17.8<br>± 2.95 | 16.2<br>± 1.48 | 19.9<br>± 0.37 | 16.5<br>± 0.87  | 4.6<br>± 0.19  |
| .....                                       |                                |                |                |                |                |                |                 |                |
| <u><i>SC media (- ino.)</i><sup>5</sup></u> |                                |                |                |                |                |                |                 |                |
| Y700 <sup>2</sup>                           | 0.05<br>± 0.06                 | 0.11<br>± 0.08 | 0.01<br>± 0.01 | 0.51<br>± 0.46 | 0.06<br>± 0.06 | 0.66<br>± 0.63 | 0.07<br>± 0.07  | 0.17<br>± 0.19 |
| Percent <sup>3</sup>                        | 2.8<br>± 0.57                  | 7.4<br>± 2.17  | 0.6<br>± 0.01  | 31.3<br>± 3.48 | 3.4<br>± 0.003 | 37.8<br>± 0.46 | 3.8<br>± 0.31   | 8.1<br>± 3.23  |
| Y700 <i>pGAL-ACBI</i> <sup>2</sup>          | 0.39<br>± 0.41                 | 0.61<br>± 0.63 | 0.22<br>± 0.23 | 0.74<br>± 0.65 | 0.51<br>± 0.45 | 0.66<br>± 0.53 | 0.40<br>± 0.37  | 0.18<br>± 0.19 |
| Percent                                     | 9.0<br>± 2.25                  | 14.6<br>± 2.52 | 5.2<br>± 1.14  | 19.8<br>± 1.65 | 13.4<br>± 0.78 | 18.9<br>± 3.98 | 10.6<br>± 0.46  | 4.1<br>± 1.02  |

<sup>1</sup> Only molecular species constituting 3 % or more, in at least one of the used growth conditions, are shown.

<sup>2</sup> The <sup>12</sup>C/<sup>13</sup>C ratio between ion counts for each individual <sup>12</sup>C-species and one selected <sup>13</sup>C-specie in each lipid class.

<sup>3</sup> Percent that each species constitute of the total phospholipid class.

<sup>4</sup> SC media supplemented with 0.2 mM inositol.

<sup>5</sup> SC media without inositol.

**Supplementary data S4. Distribution of PC species in Y700 *pGAL-ACBI* and Y700 cells.**

| Strain                                      | Molecular species <sup>1</sup> |                 |                 |                |                |                |                |                |
|---------------------------------------------|--------------------------------|-----------------|-----------------|----------------|----------------|----------------|----------------|----------------|
|                                             | 28:1                           | 30:1            | 30:2            | 32:1           | 32:2           | 34:1           | 34:2           | 36:2           |
| <u><i>YPD media</i></u>                     |                                |                 |                 |                |                |                |                |                |
| Y700 <sup>2</sup>                           | 0.14<br>± 0.01                 | 0.20<br>± 0.01  | 0.12<br>± 0.02  | 0.53<br>± 0.18 | 2.69<br>± 0.12 | 0.44<br>± 0.04 | 4.15<br>± 0.26 | 0.89<br>± 0.18 |
| Percent <sup>3</sup>                        | 1.5<br>± 0.20                  | 2.1<br>± 0.01   | 1.2<br>± 0.07   | 5.4<br>± 1.48  | 28.0<br>± 0.87 | 4.5<br>± 0.11  | 43.1<br>± 0.53 | 9.2<br>± 1.20  |
| Y700 <i>pGAL-ACBI</i> <sup>2</sup>          | 0.31<br>± 0.10                 | 0.21<br>± 0.07  | 0.54<br>± 0.07  | 0.28<br>± 0.11 | 3.71<br>± 0.75 | 0.20<br>± 0.02 | 3.30<br>± 0.73 | 0.59<br>± 0.21 |
| Percent <sup>3</sup>                        | 3.2<br>± 0.37                  | 2.2<br>± 0.24   | 5.6<br>± 0.52   | 2.8<br>± 0.50  | 38.2<br>± 0.70 | 2.1<br>± 0.26  | 33.9<br>± 0.01 | 6.0<br>± 0.83  |
| <u><i>SC media (+ ino.)</i><sup>4</sup></u> |                                |                 |                 |                |                |                |                |                |
| Y700 <sup>1</sup>                           | 0.13<br>± 0.09                 | 0.12<br>± 0.005 | 0.14<br>± 0.08  | 0.40<br>± 0.25 | 3.36<br>± 1.43 | 0.32<br>± 0.22 | 4.68<br>± 2.31 | 0.40<br>± 0.07 |
| Percent <sup>3</sup>                        | 1.2<br>± 0.29                  | 1.3<br>± 0.59   | 1.4<br>± 0.14   | 3.8<br>± 0.69  | 34.3<br>± 2.29 | 3.0<br>± 0.77  | 46.9<br>± 0.47 | 4.4<br>± 1.39  |
| Y700 <i>pGAL-ACBI</i> <sup>2</sup>          | 0.23<br>± 0.08                 | 0.22<br>± 0.12  | 0.45<br>± 0.18  | 0.29<br>± 0.12 | 3.80<br>± 1.33 | 0.28<br>± 0.33 | 3.12<br>± 0.43 | 0.40<br>± 0.01 |
| Percent <sup>3</sup>                        | 2.5<br>± 0.16                  | 2.3<br>± 0.56   | 4.8<br>± 0.50   | 3.1<br>± 0.36  | 41.1<br>± 1.58 | 2.6<br>± 2.75  | 34.9<br>± 6.23 | 4.6<br>± 1.48  |
| <u><i>SC media (- ino.)</i><sup>5</sup></u> |                                |                 |                 |                |                |                |                |                |
| Y700 <sup>2</sup>                           | 0.16<br>± 0.06                 | 0.84<br>± 0.59  | 0.07<br>± 0.003 | 2.95<br>± 0.87 | 2.94<br>± 0.94 | 2.21<br>± 0.96 | 3.31<br>± 0.86 | 0.46<br>± 0.20 |
| Percent <sup>3</sup>                        | 1.2<br>± 0.03                  | 5.8<br>± 2.42   | 0.5<br>± 0.20   | 22.0<br>± 1.00 | 21.9<br>± 0.49 | 16.1<br>± 1.64 | 24.9<br>± 2.08 | 3.3<br>± 0.34  |
| Y700 <i>pGAL-ACBI</i> <sup>2</sup>          | 0.37<br>± 0.07                 | 0.60<br>± 0.07  | 0.57<br>± 0.06  | 1.14<br>± 0.23 | 4.45<br>± 1.22 | 0.58<br>± 0.28 | 4.44<br>± 0.41 | 0.58<br>± 0.03 |
| Percent <sup>3</sup>                        | 2.8<br>± 0.01                  | 4.6<br>± 0.37   | 4.3<br>± 0.35   | 8.7<br>± 0.13  | 33.5<br>± 2.95 | 4.2<br>± 1.34  | 33.9<br>± 3.23 | 4.4<br>± 0.63  |

<sup>1</sup> Only molecular species constituting 3 % or more, in at least one of the used growth conditions, are shown.

<sup>2</sup> The <sup>12</sup>C/<sup>13</sup>C ratio between ion counts for each individual <sup>12</sup>C-species and one selected <sup>13</sup>C-specie in each lipid class.

<sup>3</sup> Percent that each species constitute of the total phospholipid class.

<sup>4</sup> SC media supplemented with 0.2 mM inositol.

<sup>5</sup> SC media without inositol.

**Supplementary data S5. Distribution of PE species in Y700 *pGAL-ACBI* and Y700 cells.**

| Strain                                      | Molecular species <sup>1</sup> |                |                |                |                |                |                |                |
|---------------------------------------------|--------------------------------|----------------|----------------|----------------|----------------|----------------|----------------|----------------|
|                                             | 32:1                           | 32:2           | 34:1           | 34:2           | 36:1           | 36:2           | 38:0           | 38:2           |
| <u><i>YPD media</i></u>                     |                                |                |                |                |                |                |                |                |
| Y700 <sup>2</sup>                           | 0.38<br>± 0.04                 | 0.61<br>± 0.17 | 1.02<br>± 0.11 | 3.28<br>± 0.39 | 0.19<br>± 0.08 | 1.39<br>± 0.24 | 0.39<br>± 0.54 | 0.15<br>± 0.12 |
| Percent <sup>3</sup>                        | 5.0<br>± 0.76                  | 8.1<br>± 2.62  | 13.5<br>± 2.13 | 43.4<br>± 7.5  | 2.4<br>± 0.93  | 18.3<br>± 2.15 | 5.0<br>± 6.86  | 2.0<br>± 1.41  |
| Y700 <i>pGAL-ACBI</i> <sup>2</sup>          | 0.60<br>± 0.22                 | 1.83<br>± 0.69 | 0.66<br>± 0.08 | 3.98<br>± 0.38 | 0.08<br>± 0.02 | 1.04<br>± 0.32 | 0.65<br>± 0.90 | 0.11<br>± 0.08 |
| Percent <sup>3</sup>                        | 6.3<br>± 2.33                  | 19.2<br>± 7.22 | 6.9<br>± 0.85  | 41.7<br>± 3.87 | 0.8<br>± 0.26  | 10.9<br>± 3.41 | 6.8<br>± 9.45  | 1.2<br>± 0.89  |
| <u><i>SC media (+ ino.)<sup>4</sup></i></u> |                                |                |                |                |                |                |                |                |
| Y700 <sup>2</sup>                           | 0.42<br>± 0.37                 | 0.71<br>± 0.63 | 0.82<br>± 0.68 | 2.70<br>± 2.13 | 0.17<br>± 0.13 | 1.79<br>± 1.63 | 0.65<br>± 0.51 | 0.43<br>± 0.28 |
| Percent <sup>3</sup>                        | 5.2<br>± 0.29                  | 8.6<br>± 0.82  | 10.4<br>± 0.02 | 34.4<br>± 1.67 | 2.3<br>± 0.22  | 21.5<br>± 2.67 | 8.5<br>± 0.63  | 6.1<br>± 1.53  |
| Y700 <i>pGAL-ACBI</i> <sup>2</sup>          | 0.24<br>± 0.16                 | 0.75<br>± 0.53 | 0.25<br>± 0.28 | 2.07<br>± 1.31 | 0.10<br>± 0.10 | 1.02<br>± 0.69 | 0.58<br>± 0.32 | 0.34<br>± 0.11 |
| Percent <sup>3</sup>                        | 4.2<br>± 0.05                  | 12.9<br>± 1.03 | 3.6<br>± 2.69  | 37.1<br>± 0.95 | 1.6<br>± 0.69  | 18.0<br>± 0.42 | 10.8<br>± 1.42 | 6.9<br>± 2.61  |
| <u><i>SC media (- ino.)<sup>5</sup></i></u> |                                |                |                |                |                |                |                |                |
| Y700 <sup>2</sup>                           | 0.52<br>± 0.47                 | 0.42<br>± 0.29 | 1.08<br>± 0.83 | 1.74<br>± 1.20 | 0.44<br>± 0.35 | 0.83<br>± 0.64 | 0.40<br>± 0.19 | 0.27<br>± 0.11 |
| Percent <sup>3</sup>                        | 7.9<br>± 2.14                  | 7.1<br>± 0.27  | 17.6<br>± 1.14 | 29.5<br>± 1.07 | 7.2<br>± 0.72  | 13.6<br>± 1.05 | 7.4<br>± 2.12  | 5.2<br>± 1.88  |
| Y700 <i>pGAL-ACBI</i> <sup>2</sup>          | 0.60<br>± 0.54                 | 1.06<br>± 1.11 | 0.91<br>± 0.86 | 2.83<br>± 2.43 | 0.32<br>± 0.29 | 1.36<br>± 1.05 | 0.77<br>± 0.49 | 0.42<br>± 0.18 |
| Percent <sup>3</sup>                        | 5.2<br>± 1.37                  | 10.7<br>± 4.16 | 7.0<br>± 2.16  | 34.0<br>± 3.48 | 2.7<br>± 0.93  | 17.9<br>± 0.54 | 11.0<br>± 1.69 | 6.7<br>± 2.20  |

<sup>1</sup> Only molecular species constituting 3 % or more, in at least one of the used growth conditions, are shown.

<sup>2</sup> The <sup>12</sup>C/<sup>13</sup>C ratio between ion counts for each individual <sup>12</sup>C-species and one selected <sup>13</sup>C-specie in each lipid class.

<sup>3</sup> Percent that each species constitute of the total phospholipid class.

<sup>4</sup> SC media supplemented with 0.2 mM inositol.

<sup>5</sup> SC media without inositol.

**Supplementary data S6. Distribution of PG species in Y700 *pGAL-ACBI* and Y700 cells.**

| Strain                                      | Molecular species <sup>1</sup> |                |                |                |                |                |                |                |
|---------------------------------------------|--------------------------------|----------------|----------------|----------------|----------------|----------------|----------------|----------------|
|                                             | 28:0                           | 30:1           | 32:1           | 32:2           | 34:1           | 34:2           | 36:1           | 36:2           |
| <u><i>YPD media</i></u>                     |                                |                |                |                |                |                |                |                |
| Y700 <sup>2</sup>                           | 0.12<br>± 0.08                 | 0.18<br>± 0.08 | 1.41<br>± 0.66 | 0.56<br>± 0.03 | 4.21<br>± 0.33 | 1.75<br>± 0.03 | 0.44<br>± 0.11 | 0.45<br>± 0.11 |
| Percent <sup>3</sup>                        | 1.2<br>± 0.64                  | 1.8<br>± 0.51  | 14<br>± 4.72   | 5.8<br>± 0.54  | 43.2<br>± 3.00 | 18.0<br>± 2.33 | 4.5<br>± 0.50  | 4.5<br>± 0.43  |
| Y700 <i>pGAL-ACBI</i> <sup>2</sup>          | 0.16<br>± 0.08                 | 0.46<br>± 0.06 | 1.07<br>± 0.10 | 1.18<br>± 0.08 | 1.32<br>± 0.27 | 1.77<br>± 0.18 | 0.19<br>± 0.05 | 0.69<br>± 0.10 |
| Percent <sup>3</sup>                        | 2.0<br>± 1.07                  | 5.8<br>± 1.15  | 13.2<br>± 0.39 | 14.5<br>± 0.02 | 16.5<br>± 4.42 | 21.8<br>± 0.79 | 2.4<br>± 0.48  | 8.5<br>± 0.69  |
| <hr/>                                       |                                |                |                |                |                |                |                |                |
| <u><i>SC media (+ ino.)<sup>4</sup></i></u> |                                |                |                |                |                |                |                |                |
| Y700 <sup>2</sup>                           | 0.28<br>± 0.15                 | 0.53<br>± 0.58 | 2.21<br>± 2.46 | 1.38<br>± 1.72 | 4.14<br>± 4.30 | 2.09<br>± 2.24 | 0.44<br>± 0.50 | 0.59<br>± 0.52 |
| Percent <sup>3</sup>                        | 3.4<br>± 2.46                  | 3.9<br>± 0.29  | 15.4<br>± 2.48 | 8.1<br>± 4.53  | 31.8<br>± 0.78 | 15.4<br>± 0.80 | 2.9<br>± 0.71  | 5.3<br>± 1.62  |
| Y700 <i>pGAL-ACBI</i> <sup>2</sup>          | 0.11<br>± 0.11                 | 0.20<br>± 0.24 | 0.57<br>± 0.80 | 0.51<br>± 0.55 | 1.35<br>± 1.36 | 0.95<br>± 0.62 | 0.16<br>± 0.14 | 0.30<br>± 0.01 |
| Percent <sup>3</sup>                        | 2.0<br>± 0.14                  | 3.1<br>± 1.65  | 6.4<br>± 9.08  | 8.8<br>± 1.99  | 24.8<br>± 1.86 | 22.9<br>± 10.3 | 3.0<br>± 0.17  | 10.8<br>± 10.7 |
| <hr/>                                       |                                |                |                |                |                |                |                |                |
| <u><i>SC media (- ino.)<sup>5</sup></i></u> |                                |                |                |                |                |                |                |                |
| Y700 <sup>2</sup>                           | 0.84<br>± 0.82                 | 0.84<br>± 0.68 | 7.34<br>± 5.28 | 1.10<br>± 1.03 | 11.5<br>± 8.91 | 2.43<br>± 1.22 | 0.43<br>± 0.33 | 1.18<br>± 0.40 |
| Percent <sup>3</sup>                        | 2.6<br>± 1.02                  | 2.9<br>± 0.34  | 26.4<br>± 0.33 | 3.6<br>± 1.08  | 40.1<br>± 2.66 | 9.7<br>± 2.67  | 1.5<br>± 0.07  | 6.4<br>± 6.11  |
| Y700 <i>pGAL-ACBI</i> <sup>2</sup>          | 0.52<br>± 0.62                 | 1.26<br>± 1.30 | 2.62<br>± 2.09 | 2.88<br>± 3.10 | 4.11<br>± 3.24 | 4.00<br>± 2.99 | 0.43<br>± 0.46 | 1.27<br>± 0.29 |
| Percent <sup>3</sup>                        | 2.1<br>± 1.66                  | 5.9<br>± 2.25  | 14.2<br>± 0.23 | 13.0<br>± 6.19 | 22.4<br>± 0.67 | 22.3<br>± 1.87 | 2.0<br>± 0.87  | 11.1<br>± 10.5 |

<sup>1</sup> Only molecular species constituting 3 % or more, in at least one of the used growth conditions, are shown.

<sup>2</sup> The <sup>12</sup>C/<sup>13</sup>C ratio between ion counts for each individual <sup>12</sup>C-species and one selected <sup>13</sup>C-specie in each lipid class.

<sup>3</sup> Percent that each species constitute of the total phospholipid class.

<sup>4</sup> SC media supplemented with 0.2 mM inositol.

<sup>5</sup> SC media without inositol.

**Supplementary data S7. Distribution of PS species in Y700 *pGAL-ACBI* and Y700 cells.**

| Strain                                      | Molecular species <sup>1</sup> |                |                |                 |                |                |                |                |
|---------------------------------------------|--------------------------------|----------------|----------------|-----------------|----------------|----------------|----------------|----------------|
|                                             | 28:0                           | 28:2           | 32:1           | 32:2            | 34:1           | 34:2           | 38:1           | 38:2           |
| <u><i>YPD media</i></u>                     |                                |                |                |                 |                |                |                |                |
| Y700 <sup>2</sup>                           | 0.08<br>± 0.006                | 0.28<br>± 0.02 | 0.63<br>± 0.11 | 0.26<br>± 0.05  | 3.30<br>± 0.06 | 2.47<br>± 0.05 | 0.09<br>± 0.06 | 0.16<br>± 0.17 |
| Percent <sup>3</sup>                        | 1.0<br>± 0.02                  | 3.5<br>± 0.09  | 7.9<br>± 0.90  | 3.3<br>± 0.43   | 41.6<br>± 1.64 | 31.2<br>± 1.07 | 1.1<br>± 0.65  | 1.9<br>± 2.04  |
| Y700 <i>pGAL-ACBI</i> <sup>2</sup>          | 0.16<br>± 0.06                 | 0.10<br>± 0.01 | 0.72<br>± 0.17 | 0.75<br>± 0.17  | 1.15<br>± 0.18 | 2.30<br>± 0.07 | 0.07<br>± 0.01 | 0.10<br>± 0.03 |
| Percent <sup>3</sup>                        | 2.7<br>± 1.20                  | 1.6<br>± 0.05  | 11.6<br>± 1.67 | 12.1<br>± 1.70  | 18.6<br>± 1.20 | 37.2<br>± 2.13 | 1.1<br>± 0.33  | 1.6<br>± 0.36  |
| <hr/>                                       |                                |                |                |                 |                |                |                |                |
| <u><i>SC media (+ ino.)<sup>4</sup></i></u> |                                |                |                |                 |                |                |                |                |
| Y700 <sup>2</sup>                           | 0.22<br>± 0.09                 | 0.57<br>± 0.45 | 0.76<br>± 0.62 | 0.29<br>± 0.17  | 2.06<br>± 1.33 | 1.48<br>± 1.07 | 0.18<br>± 0.06 | 0.57<br>± 0.28 |
| Percent <sup>3</sup>                        | 3.3<br>± 0.45                  | 7.9<br>± 2.26  | 10.3<br>± 3.53 | 4.3<br>± 0.10   | 29.6<br>± 3.37 | 20.8<br>± 4.34 | 3.3<br>± 2.68  | 11.4<br>± 10.5 |
| Y700 <i>pGAL-ACBI</i> <sup>2</sup>          | 0.18<br>± 0.10                 | 0.18<br>± 0.11 | 0.42<br>± 0.21 | 0.02<br>± 0.003 | 1.30<br>± 0.30 | 0.01<br>± 0.01 | 0.26<br>± 0.08 | 0.55<br>± 0.14 |
| Percent <sup>3</sup>                        | 3.9<br>± 1.11                  | 3.9<br>± 1.36  | 9.0<br>± 2.21  | 9.9<br>± 2.32   | 11.9<br>± 5.10 | 29.5<br>± 1.79 | 6.3<br>± 3.49  | 13.2<br>± 6.83 |
| <hr/>                                       |                                |                |                |                 |                |                |                |                |
| <u><i>SC media (- ino.)<sup>5</sup></i></u> |                                |                |                |                 |                |                |                |                |
| Y700 <sup>2</sup>                           | 0.22<br>± 0.11                 | 0.82<br>± 0.82 | 1.53<br>± 1.52 | 0.37<br>± 0.34  | 2.63<br>± 2.43 | 1.85<br>± 1.68 | 0.22<br>± 0.09 | 0.45<br>± 0.32 |
| Percent <sup>3</sup>                        | 2.9<br>± 1.05                  | 8.3<br>± 2.82  | 15.4<br>± 5.13 | 3.9<br>± 0.81   | 27.9<br>± 5.62 | 19.7<br>± 3.61 | 4.2<br>± 4.41  | 9.6<br>± 11.3  |
| Y700 <i>pGAL-ACBI</i> <sup>2</sup>          | 0.32<br>± 0.14                 | 0.46<br>± 0.43 | 1.43<br>± 1.10 | 1.17<br>± 1.11  | 1.60<br>± 0.92 | 3.13<br>± 2.76 | 0.22<br>± 0.06 | 0.63<br>± 0.39 |
| Percent <sup>3</sup>                        | 3.5<br>± 1.06                  | 4.0<br>± 1.44  | 13.3<br>± 1.54 | 9.9<br>± 3.87   | 16.3<br>± 2.31 | 27.6<br>± 7.71 | 3.0<br>± 2.65  | 9.7<br>± 10.4  |

<sup>1</sup> Only molecular species constituting 3 % or more, in at least one of the used growth conditions, are shown.

<sup>2</sup> The <sup>12</sup>C/<sup>13</sup>C ratio between ion counts for each individual <sup>12</sup>C-species and one selected <sup>13</sup>C-specie in each lipid class.

<sup>3</sup> Percent that each species constitute of the total phospholipid class.

<sup>4</sup> SC media supplemented with 0.2 mM inositol.

<sup>5</sup> SC media without inositol.

**Supplementary data S8. Distribution of PA species in Y700 *pGAL-ACBI* and Y700 cells.**

| Strain                                       | Molecular species <sup>1</sup> |                |                |                |                |                |                |                |
|----------------------------------------------|--------------------------------|----------------|----------------|----------------|----------------|----------------|----------------|----------------|
|                                              | 28:1                           | 30:1           | 32:1           | 32:2           | 34:1           | 34:2           | 36:1           | 36:2           |
| <u><i>YPD media</i></u>                      |                                |                |                |                |                |                |                |                |
| Y700 <sup>2</sup>                            | 0.16<br>± 0.05                 | 0.52<br>± 0.30 | 1.73<br>± 1.10 | 1.29<br>± 1.15 | 5.55<br>± 0.05 | 5.85<br>± 0.16 | 1.29<br>± 0.06 | 1.86<br>± 0.16 |
| Percent <sup>3</sup>                         | 0.8<br>± 0.18                  | 2.5<br>± 1.25  | 8.5<br>± 4.63  | 6.3<br>± 5.13  | 28.5<br>± 3.59 | 30.0<br>± 4.32 | 6.6<br>± 0.47  | 9.6<br>± 1.91  |
| <u><i>pGAL-ACBI</i></u>                      |                                |                |                |                |                |                |                |                |
| <i>pGAL-ACBI</i> <sup>2</sup>                | 0.09<br>± 0.12                 | 0.26<br>± 0.02 | 1.38<br>± 0.44 | 2.06<br>± 0.46 | 2.69<br>± 0.13 | 8.35<br>± 0.27 | 0.44<br>± 0.11 | 1.88<br>± 0.53 |
| Percent <sup>3</sup>                         | 0.5<br>± 0.61                  | 1.4<br>± 0.16  | 7.5<br>± 2.60  | 11.2<br>± 2.78 | 14.5<br>± 1.10 | 45.0<br>± 0.18 | 2.3<br>± 0.51  | 10.1<br>± 2.56 |
| <u><i>SC media (+ ino.)</i></u> <sup>4</sup> |                                |                |                |                |                |                |                |                |
| Y700 <sup>2</sup>                            | 0.60<br>± 0.68                 | 0.58<br>± 0.27 | 2.48<br>± 1.85 | 1.50<br>± 0.63 | 3.78<br>± 2.37 | 3.78<br>± 1.91 | 0.71<br>± 0.30 | 0.43<br>± 0.10 |
| Percent <sup>3</sup>                         | 3.0<br>± 2.80                  | 3.6<br>± 0.01  | 14.1<br>± 4.99 | 9.3<br>± 0.35  | 22.2<br>± 4.51 | 22.9<br>± 1.39 | 4.4<br>± 0.12  | 2.8<br>± 0.67  |
| <u><i>pGAL-ACBI</i></u>                      |                                |                |                |                |                |                |                |                |
| <i>pGAL-ACBI</i> <sup>2</sup>                | 0.77<br>± 0.35                 | 0.60<br>± 0.40 | 1.43<br>± 0.81 | 1.84<br>± 1.31 | 1.18<br>± 0.95 | 3.89<br>± 2.78 | 0.23<br>± 0.07 | 1.00<br>± 0.55 |
| Percent <sup>3</sup>                         | 5.9<br>± 0.49                  | 4.3<br>± 0.68  | 10.5<br>± 0.52 | 12.9<br>± 2.97 | 8.0<br>± 2.89  | 27.3<br>± 6.31 | 1.9<br>± 0.47  | 7.4<br>± 0.18  |
| <u><i>SC media (- ino.)</i></u> <sup>5</sup> |                                |                |                |                |                |                |                |                |
| Y700 <sup>2</sup>                            | 0.14<br>± 0.03                 | 0.47<br>± 0.43 | 3.15<br>± 2.41 | 1.10<br>± 0.58 | 4.81<br>± 3.45 | 2.79<br>± 1.75 | 0.43<br>± 0.12 | 0.06<br>± 0.03 |
| Percent <sup>3</sup>                         | 1.2<br>± 0.59                  | 2.9<br>± 1.17  | 21.1<br>± 3.40 | 8.1<br>± 1.16  | 32.9<br>± 3.23 | 19.8<br>± 0.33 | 3.4<br>± 1.33  | 0.5<br>± 0.13  |
| <u><i>pGAL-ACBI</i></u>                      |                                |                |                |                |                |                |                |                |
| <i>pGAL-ACBI</i> <sup>2</sup>                | 1.13<br>± 0.51                 | 0.95<br>± 0.67 | 1.83<br>± 0.40 | 2.45<br>± 1.47 | 1.80<br>± 0.98 | 4.16<br>± 2.22 | 0.55<br>± 0.34 | 0.07<br>± 0.09 |
| Percent <sup>3</sup>                         | 7.1<br>± 0.35                  | 5.5<br>± 1.41  | 12.2<br>± 3.52 | 14.8<br>± 1.84 | 11.0<br>± 0.68 | 25.5<br>± 1.22 | 3.3<br>± 0.50  | 0.3<br>± 0.43  |

<sup>1</sup> Only molecular species constituting 3 % or more, in at least one of the used growth conditions, are shown.

<sup>2</sup> The <sup>12</sup>C/<sup>13</sup>C ratio between ion counts for each individual <sup>12</sup>C-species and one selected <sup>13</sup>C-specie in each lipid class.

<sup>3</sup> Percent that each species constitute of the total phospholipid class.

<sup>4</sup> SC media supplemented with 0.2 mM inositol.

<sup>5</sup> SC media without inositol.
